# Supplementary material for: Effects ofDendrobium officinaleultrafine powder on sub-health mice induced by unhealthy lifestyle based on neuroendocrine immune system
Source: Royal Society of Chemistry journal article supplement (doi:10.1039/d2fo02158g), 2022-01-01
Supplement: d2fo02158g1.pdf [file d2fo02158g1.pdf]

## Supplementary information

### Effects of *Dendrobium officinale* ultrafine powder on sub-health mice induced by unhealthy lifestyle based on neuroendocrine immune system

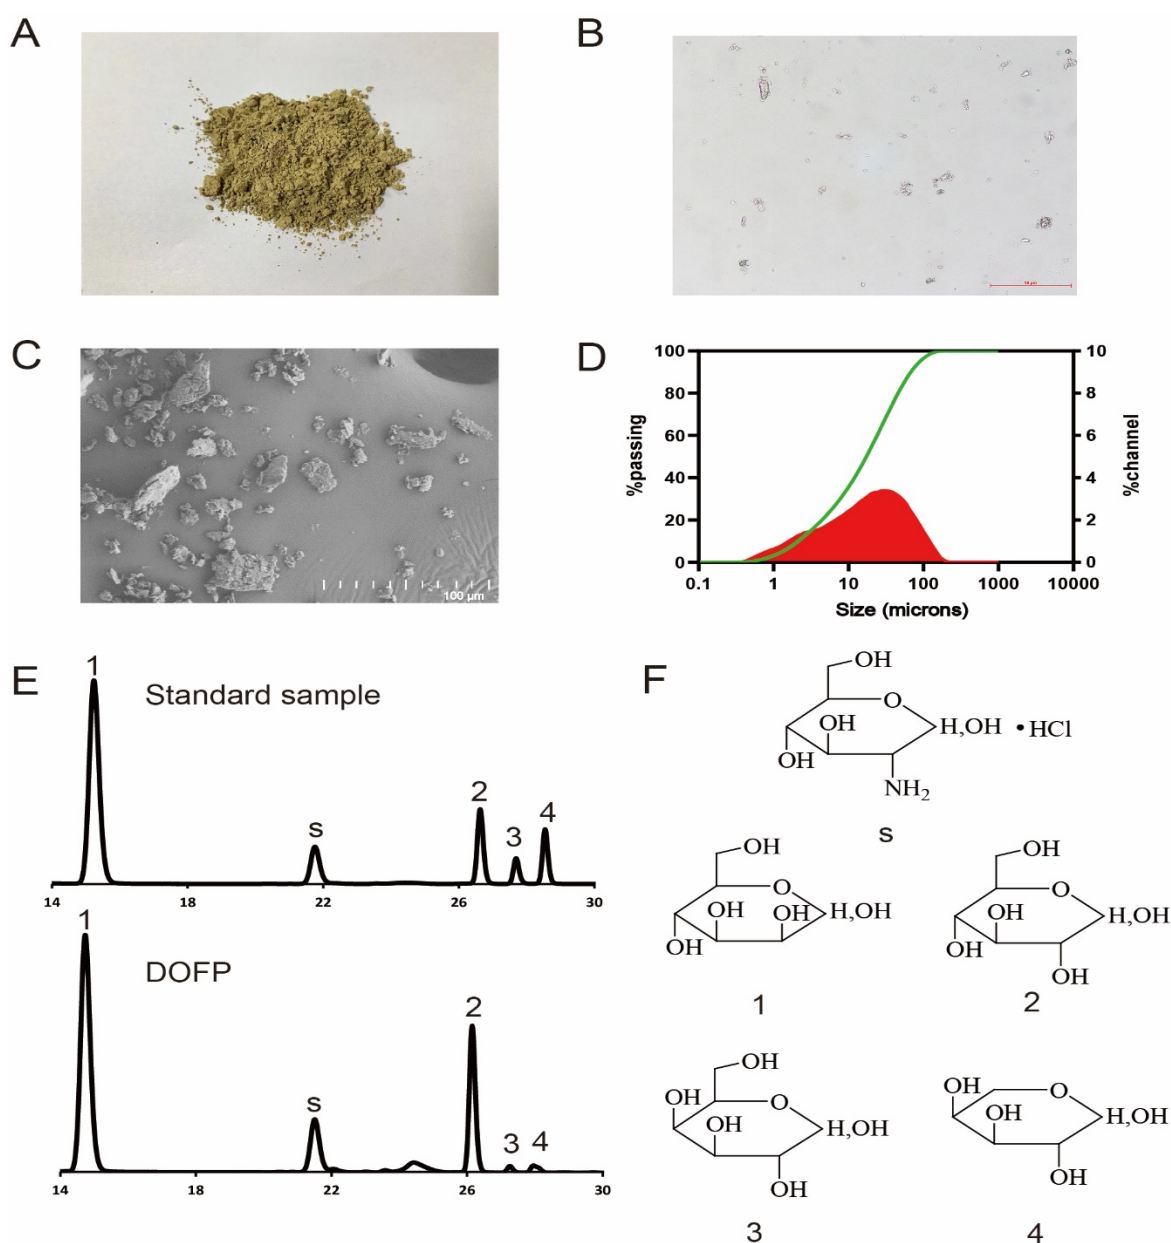

**Fig. S** Preparation and characteristic of DOFP. (A) Visual observation of DOFP in daylight. (B) Photomicrograph of microscope at 200×. (C) Ultrastructure of DOFP by scanning electron microscope. (D) Size distribution of DOFP particles. (E) High-performance liquid chromatography (HPLC) chromatogram of mixed standards and DOFP sample. (F) The structural formula for standards: s is the internal standard Chitosamine hydrochloride, 1 is D-mannose, 2 is glucose, 3 is galactose, 4 is arabinose.
